# Supplementary material for: 2019 Update of the Korean Clinical Practice Guidelines of Stroke for Endovascular Recanalization Therapy in Patients with Acute Ischemic Stroke
Source: PubMed Central journal article supplement — Neurointervention. 2019 Aug 23;14(2):71–81. doi: 10.5469/neuroint.2019.00164 (PMC6736502; doi:10.5469/neuroint.2019.00164), 2019-08-23
Supplement: neuroint-2019-00164-suppl1.pdf [file neuroint-2019-00164-suppl1.pdf]

**Supplementary Table 1. List of responding participants**

| Participants    | Affiliation                                                                                                                     |
|-----------------|---------------------------------------------------------------------------------------------------------------------------------|
| Jang-Hyun Baek  | Department of Neurology, National Medical Center, Seoul, Korea                                                                  |
| Dong-Hyun Shim  | Department of Neurology, Samsung Changwon Hospital, Sungkyunkwan University School of Medicine, Changwon, Korea                 |
| Dong Geun Lee   | Department of Neurology, Sejong General Hospital, Bucheon, Korea                                                                |
| Hee-Kwon Park   | Department of Neurology, Inha University Hospital, Incheon, Korea                                                               |
| Woo-Keun Seo    | Department of Neurology and Stroke Center, Samsung Medical Center, Sungkyunkwan University School of Medicine, Seoul, Korea     |
| Joonsang Yoo    | Department of Neurology, Keimyung University Dongsan Medical Center, Daegu, Korea                                               |
| Jun Lee         | Department of Neurology, Yeungnam University Hospital, Daegu, Korea                                                             |
| Jin Soo Lee     | Department of Neurology, Ajou University School of Medicine, Suwon, Korea                                                       |
| Sam Yeol Ha     | Department of Neurology, Inje University Haeundae Paik Hospital, Busan, Korea                                                   |
| Jeong-Jin Park  | Department of Neurology, Konkuk University Hospital, Seoul, Korea                                                               |
| Si Baek Lee     | Department of Neurology, Uijeongbu St. Mary's Hospital, College of Medicine, The Catholic University of Korea, Uijeongbu, Korea |
| Jun Young Chang | Department of Neurology, Asan Medical Center, University of Ulsan College of Medicine, Seoul, Korea                             |
| Ho Geol Woo     | Department of Neurology, Soonchunhyang University Cheonan Hospital, Cheonan, Korea                                              |
| Sang Joon An    | Department of Neurology, International St. Mary's Hospital, Catholic Kwandong University College of Medicine, Incheon, Korea    |
| Ji Hoe Heo      | Department of Neurology, Severance Hospital, Yonsei University College of Medicine, Seoul, Korea                                |
| Joung-Ho Rha    | Department of Neurology, Inha University School of Medicine, Incheon, Korea                                                     |
| Sun U. Kwon     | Department of Neurology, Asan Medical Center, University of Ulsan College of Medicine, Seoul, Korea                             |
| Keun-Sik Hong   | Department of Neurology, Inje University Ilsan Paik Hospital, Goyang, Korea                                                     |
| Sang-Bae Ko     | Department of Neurology, Seoul National University Hospital, Seoul, Korea                                                       |
| Hong-Kyun Park  | Department of Neurology, Inje University Ilsan Paik Hospital, Goyang, Korea                                                     |
| Jong S. Kim     | Department of Neurology, Asan Medical Center, University of Ulsan College of Medicine, Seoul, Korea                             |
| Byung-Chul Lee  | Department of Neurology, Hallym University Sacred Heart Hospital, Anyang, Korea                                                 |
| Joong Hyun Park | Department of Neurology, Inje University Sanggye Paik Hospital, Seoul, Korea                                                    |
| Sang-Min Sung   | Department of Neurology, Pusan National University Hospital, Busan, Korea                                                       |
| Byoung-Soo Shin | Department of Neurology, Chonbuk National University Medical School, Jeonju, Korea                                              |
| Sungwook Yu     | Department of Neurology, Korea University Anam Hospital, Seoul, Korea                                                           |
| Tae-Jin Song    | Department of Neurology, Ewha Womans University Mokdong Hospital, Seoul, Korea                                                  |
| Byung Moon Kim  | Department of Radiology, Severance Stroke Center, Severance Hospital, Yonsei University College of Medicine, Seoul, Korea       |
| Sang Hyun Suh   | Department of Radiology, Gangnam Severance Hospital, Yonsei University College of Medicine, Seoul, Korea                        |
| Cheolkyu Jung   | Department of Radiology, Seoul National University Bundang Hospital, Seongnam, Korea                                            |
| Tae Gon Kim     | Department of Neurosurgery, CHA Bundang Medical Center, CHA University, Seongnam, Korea                                         |
| Sang-Hoon Cha   | Department of Radiology, Chungbuk National University College of Medicine, Cheongju, Korea                                      |
| Hyon Jo Kwon    | Department of Neurosurgery, Chungnam National University Hospital, Daejeon, Korea                                               |
| Woong Yoon      | Department of Radiology, Chonnam National University Hospital, Gwangju, Korea                                                   |
| Hae Woong Jeong | Department of Radiology, Inje University Busan Paik Hospital, Busan, Korea                                                      |
| Dong-Hun Kang   | Department of Neurosurgery, School of Medicine, Kyungpook National University, Daegu, Korea                                     |
| Chang-Hyun Kim  | Department of Neurosurgery, Keimyung University Dongsan Medical Center, Daegu, Korea                                            |
| Yoo Dong Won    | Department of Radiology, Uijeongbu St. Mary's Hospital, College of Medicine, The Catholic University of Korea, Uijeongbu, Korea |
| Jin Woo Kim     | Department of Radiology, Inje University Ilsan Paik Hospital, Goyang, Korea                                                     |
| Hong Jun Jeon   | Department of Neurosurgery, Hallym University Kangdong Sacred Heart Hospital, Seoul, Korea                                      |
| Byungjoon Kim   | Department of Radiology, Korea University Anam Hospital, Korea University College of Medicine, Seoul, Korea                     |
